# Supplementary material
Source: publisher site journal article supplement (https://www.dovepress.com/get_supplementary_file.php?f=435437.xlsx)
Supplement: Supplementary file 1 [file get_supplementary_file.php]

## Sheet: Data
ID	Culture	Age	Gender	Employment	NFA_AP	NFA_AV	FoMo	SMD_Score			NFA_AP_outliers replaced
1	1	19	0	employed	0	-0.4	4	36			0
2	1	29	0	Not employed	0.6	0	4	27			0.6
3	1	32	0	employed	0.8	-0.4	4	24			0.8
4	1	22	1	Student	2.4	0.8	3	30			2.4
5	1	25	0	employed	0.2	0.4	3	31			0.2
6	1	25	1	Student	1.4	0	3	25			1.4
7	1	38	0	employed	-0.4	-0.2	1	23			-0.4
8	1	29	0	employed	0.2	-1.2	1	16			0.2
9	1	28	0	employed	0	1.6	2	21			0
10	1	35	0	employed	0	2.2	4	25			0
11	1	27	1	Student	2.6	-0.2	4	33			2.6
12	1	31	0	employed	-1.6	-1.4	4	36			-1.6
13	1	25	1	Student	2.2	1.4	5	19			2.2
14	1	30	0	employed	-0.2	0	4	29			-0.2
15	1	20	0	employed	0.2	0.2	2	24			0.2
16	1	23	0	Student	1.2	0.4	3	25			1.2
17	1	30	0	employed	1	-2.2	2	17			1
18	1	23	0	Student	2.8	-3	5	34			2.8
19	1	25	0	Not employed	-0.6	1.2	1	21			-0.6
20	1	32	1	employed	1.6	-1.2	4	29			1.6
21	1	34	0	employed	1	1	4	24			1
22	1	23	0	employed	2	0.6	4	22			2
23	1	32	1	Not employed	2.6	-1.8	5	32			2.6
24	1	25	1	employed	1	0.4	4	21			1
25	1	27	1	Student	0.8	-2	5	35			0.8
26	1	21	1	employed	3	-1	3	29			3
27	1	40	1	employed	1.8	0.2	4	26			1.8
28	1	32	0	employed	1.6	-1.8	3	29			1.6
29	1	20	1	Student	2	-1	4	21			2
30	1	21	1	Student	-0.4	2.4	3	24			-0.4
31	1	32	0	employed	-1.6	-1.8	2	9			-1.6
32	1	24	0	Student	-0.8	0.6	5	32			-0.8
33	1	23	0	employed	0	-1	2	21			0
34	1	24	1	employed	2.2	-0.4	4	30			2.2
35	1	30	0	employed	0	-1.6	3	28			0
36	1	29	1	employed	-0.4	0.8	3	31			-0.4
37	1	39	0	employed	0.8	-0.8	3	17			0.8
38	1	25	0	employed	2.6	-3	1	11			2.6
39	1	19	1	Student	-0.4	2	3	19			-0.4
40	1	18	1	employed	2	-2.2	5	31			2
41	1	44	0	employed	1.4	-0.6	3	21			1.4
42	1	23	1	employed	1.2	1.2	4	26			1.2
43	1	20	1	employed	0.6	0	3	24			0.6
44	1	30	1	employed	1.4	0.4	2	24			1.4
45	1	37	1	Student	2.2	1.4	3	31			2.2
46	1	21	1	Student	1.6	-1.4	4	23			1.6
47	1	20	1	employed	2.6	3	5	36			2.6
48	1	45	0	employed	1	-1.6	2	15			1
49	1	25	1	Student	1.8	-1.8	4	21			1.8
50	1	23	0	Student	0.6	0	4	32			0.6
51	1	24	1	Student	0.2	-0.6	3	33			0.2
52	1	27	1	employed	0	0.2	3	28			0
53	1	19	0	Student	1	0	3	22			1
54	1	32	0	employed	0.2	-2.2	2	12			0.2
55	1	21	1	employed	2.2	0.8	5	25			2.2
56	1	19	1	Not employed	0.4	2.8	3	19			0.4
57	1	21	1	Student	0.8	2.6	4	31			0.8
58	1	28	1	Student	1.6	1.2	3	25			1.6
59	1	25	0	employed	0.4	-0.8	4	19			0.4
60	1	22	0	Student	-0.2	-1.2	3	30			-0.2
61	1	22	0	Student	0.8	-0.4	2	25			0.8
62	1	21	1	employed	0.6	0	2	21			0.6
63	1	36	0	employed	-1	1.2	4	27			-1
64	1	38	0	employed	-0.4	0.6	1	13			-0.4
65	1	38	0	employed	0	-0.4	1	13			0
66	1	23	1	Student	1.2	1.4	4	22			1.2
67	1	23	0	employed	0.2	-2	2	13			0.2
68	1	28	0	Student	-1	1	4	29			-1
69	1	32	1	Not employed	1.4	-1	4	25			1.4
70	1	23	1	Student	2.2	-2.6	3	22			2.2
71	1	58	1	employed	0.4	-1.6	1	10			0.4
72	1	29	1	employed	1.4	0.8	2	28			1.4
73	1	26	0	Student	1.4	0.4	1	26			1.4
74	1	27	0	employed	0.2	-2.2	2	18			0.2
75	1	24	0	Student	1.6	-1.6	2	22			1.6
76	1	20	1	Student	1	-1.4	5	29			1
77	1	21	1	Student	1.8	0	2	21			1.8
78	1	24	0	employed	1.6	-1.2	3	21			1.6
79	1	21	1	Student	1.4	-1.2	4	27			1.4
80	1	37	0	employed	1	0	3	30			1
81	1	45	0	employed	2	-2.6	4	39			2
82	1	32	0	employed	0	0.8	4	31			0
83	1	26	1	employed	1.8	-1.2	2	22			1.8
84	1	20	1	Student	1.2	-2	4	20			1.2
85	1	35	0	employed	-0.6	1.6	5	26			-0.6
86	1	28	1	employed	1.2	-2.2	3	19			1.2
87	1	21	1	employed	2.2	-2.8	1	16			2.2
88	1	27	0	employed	-0.2	-0.6	2	26			-0.2
89	1	53	0	employed	1.2	-2.4	2	23			1.2
90	1	29	1	employed	1.4	-0.6	4	24			1.4
91	1	30	0	employed	1.2	-0.2	2	27			1.2
92	1	25	1	employed	2.6	-1.8	3	19			2.6
93	1	20	1	Student	1.4	1.6	2	29			1.4
94	1	30	0	employed	1.6	-2.2	5	28			1.6
95	1	36	0	employed	2	-2.2	5	37			2
96	1	35	1	employed	0.6	-0.8	1	19			0.6
97	1	46	0	employed	0	-0.8	5	31			0
98	1	20	0	Student	-1.8	-3	4	24			-1.8
99	1	27	0	employed	0.6	0.4	3	27			0.6
100	1	35	1	employed	1.6	-2	4	27			1.6
101	1	36	0	employed	1.8	-1.8	3	15			1.8
102	1	31	1	employed	1	-0.4	2	26			1
103	1	23	1	employed	2.4	-1	4	30			2.4
104	1	50	0	employed	1	-1.6	2	16			1
105	1	21	1	Student	1	1	3	21			1
106	1	31	0	employed	-1.2	-0.2	4	21			-1.2
107	1	27	1	employed	0	-0.2	4	18			0
108	1	27	0	employed	-0.4	0.2	5	38			-0.4
109	1	22	0	Student	2.4	-1	3	21			2.4
110	1	26	0	employed	0.6	2.8	5	28			0.6
111	1	22	0	Student	0.4	0.8	1	14			0.4
112	1	21	0	Student	0.4	-2.4	3	19			0.4
113	1	20	1	Student	0	-0.8	2	26			0
114	1	43	0	employed	2.6	-2.2	4	36			2.6
115	1	32	0	employed	1.4	-1.8	3	21			1.4
116	1	27	0	employed	0.8	0.6	5	33			0.8
117	1	25	1	Student	1.6	0.6	1	23			1.6
118	1	24	0	Student	1.8	-1.8	3	28			1.8
119	1	28	1	employed	1	-1.2	3	27			1
120	1	35	0	employed	1.2	0.4	4	36			1.2
121	1	38	0	employed	-0.6	2.6	4	27			-0.6
122	1	22	0	Student	1.4	-0.2	3	22			1.4
123	1	22	1	Student	0.2	2.6	5	33			0.2
124	1	18	0	Student	0.6	-0.8	4	34			0.6
125	1	46	0	employed	1.4	-1.2	4	32			1.4
126	1	29	0	Not employed	2.8	0.2	5	23			2.8
127	1	28	0	employed	1.2	-2	2	26			1.2
128	1	31	0	employed	0.4	0.6	2	16			0.4
129	1	37	0	employed	1.2	0	3	16			1.2
130	1	21	0	employed	2	-2.4	3	14			2
131	1	32	0	employed	0.8	-1.6	2	12			0.8
132	1	50	1	employed	1	-2.2	3	18			1
133	1	45	0	employed	-0.2	-1	2	13			-0.2
134	1	26	1	employed	0.6	0.2	3	18			0.6
135	1	24	0	employed	2.2	-1.6	3	14			2.2
136	1	28	1	employed	1	-1	3	19			1
137	1	66	0	Not employed	0.6	-0.2	3	29			0.6
138	1	50	1	employed	1.6	-2	1	12			1.6
139	1	38	0	employed	-0.4	1	2	9			-0.4
140	1	30	0	employed	-0.6	2	2	14			-0.6
141	1	26	1	employed	1	-2.2	3	20			1
142	1	27	0	employed	2.6	-2.6	1	13			2.6
143	1	32	0	employed	0.4	0.2	2	19			0.4
144	1	38	1	Student	-0.8	-1.8	1	11			-0.8
145	1	38	0	employed	1.2	1	3	15			1.2
146	1	39	1	employed	0.8	-2.2	2	11			0.8
147	1	27	1	Student	2.2	-1.8	3	29			2.2
148	1	26	1	Student	-2.2	2.2	1	38			-1.9
149	1	21	1	employed	1.4	-0.4	4	26			1.4
150	1	25	0	employed	0	-1	2	25			0
151	1	37	0	employed	0.2	0	2	16			0.2
152	1	21	0	Student	0.4	-1.6	3	13			0.4
153	1	22	0	Student	1	0	2	26			1
154	1	26	1	Student	3	-2.8	4	24			3
155	1	21	0	Student	2.6	-1.2	5	30			2.6
156	1	18	0	Student	1.8	0	3	22			1.8
157	1	45	0	employed	2	-2.2	4	31			2
158	1	38	0	employed	0.6	-0.2	4	32			0.6
159	1	22	1	Student	0.2	1.6	3	20			0.2
160	1	40	0	employed	-1	-1.8	1	17			-1
161	1	25	1	Student	1.4	-1.2	2	19			1.4
162	1	34	0	employed	1.2	-1.6	3	26			1.2
163	1	32	1	employed	1.4	-2.2	3	23			1.4
164	1	23	0	Not employed	1.4	0	2	18			1.4
165	1	21	1	Student	1	0.6	4	25			1
166	1	45	0	employed	0	0.8	3	18			0
167	1	23	1	employed	1.2	0	3	20			1.2
168	1	20	1	Student	1.2	0.2	4	26			1.2
169	1	37	1	employed	1.8	-2	4	29			1.8
170	1	19	1	Not employed	1.8	-0.4	3	24			1.8
171	1	27	1	employed	0.6	1	5	15			0.6
172	1	19	1	employed	-0.4	1.8	5	26			-0.4
173	1	38	1	employed	1.8	-2	3	30			1.8
174	1	22	1	Student	0.6	-0.2	3	26			0.6
175	1	43	0	employed	1.4	-0.2	4	27			1.4
176	1	29	1	employed	2.4	-0.8	3	29			2.4
177	1	30	0	employed	-0.8	0.8	3	32			-0.8
178	1	37	1	employed	0.6	-2.4	4	24			0.6
179	1	25	0	Student	0.6	1.4	4	19			0.6
180	1	24	0	employed	1.2	-1.2	1	19			1.2
181	1	30	1	employed	1.4	-1.6	3	21			1.4
182	1	21	1	Student	1.4	-1.2	3	20			1.4
183	1	31	0	employed	1.8	-1.6	2	17			1.8
184	1	25	0	employed	1.8	0.8	4	37			1.8
185	1	22	0	Student	0.4	-1.6	2	18			0.4
186	1	37	1	employed	0.4	-0.6	3	31			0.4
187	1	25	0	employed	1.8	-2.2	3	17			1.8
188	1	33	0	Student	-0.2	0	4	23			-0.2
189	1	28	0	Not employed	-0.2	0.6	3	26			-0.2
190	1	46	1	employed	-0.4	-0.4	3	24			-0.4
191	1	31	1	employed	2.8	-2.6	2	14			2.8
192	1	18	1	employed	1.2	-2.2	4	26			1.2
193	1	20	1	employed	-0.6	0	4	22			-0.6
194	1	22	0	Student	-0.6	0.2	1	11			-0.6
195	1	19	0	Student	1	1	4	25			1
196	1	29	0	employed	1.8	-1.4	3	20			1.8
197	1	21	0	employed	-0.6	0.8	3	12			-0.6
198	1	27	1	employed	0.6	-2.2	2	17			0.6
199	1	35	0	employed	-0.4	0.4	3	21			-0.4
200	1	22	1	employed	1.2	0	4	28			1.2
201	1	44	0	employed	1.6	-2	3	24			1.6
202	1	23	0	Student	1.6	-1.4	2	11			1.6
203	1	27	0	employed	-1.2	0.6	2	18			-1.2
204	1	20	1	Student	1.2	-0.4	2	23			1.2
205	1	37	0	employed	1.4	-2.6	2	14			1.4
206	1	26	1	Student	0.8	-1.4	4	21			0.8
207	1	21	1	employed	1	-0.2	4	19			1
208	1	27	0	Not employed	0	-0.2	2	22			0
209	1	36	0	employed	1.8	-1.6	1	11			1.8
210	1	25	0	employed	0.2	-3	1	9			0.2
211	1	24	0	Student	0.8	-0.2	4	10			0.8
212	1	19	1	Student	1	0	4	22			1
213	1	51	1	employed	0.4	-1.4	3	12			0.4
214	1	37	0	employed	0.6	-2	2	12			0.6
215	1	20	0	Student	0.2	-0.6	1	17			0.2
216	1	34	0	employed	-0.8	-1.4	3	18			-0.8
217	1	29	0	employed	0.2	-0.8	2	16			0.2
218	1	23	1	Student	0.6	0.2	2	12			0.6
219	1	23	0	Student	1.8	-3	1	14			1.8
220	1	28	0	employed	2.6	-2.2	1	14			2.6
221	1	46	0	employed	2.4	-2.6	2	10			2.4
222	1	36	1	employed	2	-0.4	3	16			2
223	1	23	1	Student	2.4	-0.2	5	18			2.4
224	1	31	0	employed	-1.4	-0.2	2	9			-1.4
225	1	27	1	employed	0.8	0.8	3	15			0.8
226	1	38	1	employed	-0.6	-1.8	1	9			-0.6
227	1	20	0	Student	0	0	5	23			0
228	1	32	1	Not employed	1.4	-1.4	3	15			1.4
229	1	22	0	employed	2.2	-2.6	1	14			2.2
230	1	34	0	employed	2	-2.6	4	15			2
231	1	21	0	employed	0.8	0	2	13			0.8
232	1	24	1	Student	1.4	2.8	2	29			1.4
233	1	21	1	employed	1	-1.8	4	14			1
234	1	22	0	employed	0.6	0.4	5	28			0.6
235	1	42	1	Not employed	0.2	0	1	9			0.2
236	1	24	1	employed	-0.4	1.8	1	12			-0.4
237	1	37	1	employed	1.4	-1.8	1	12			1.4
238	1	45	0	employed	0	-1.4	1	10			0
239	1	26	1	employed	0.6	2.2	3	26			0.6
240	1	29	0	employed	-1.4	1.2	1	9			-1.4
241	1	24	0	Student	0	1.4	2	10			0
242	1	39	0	employed	1.6	-1.8	2	9			1.6
243	1	55	0	employed	0.2	-2.2	1	11			0.2
244	1	29	0	Student	0.2	-1.2	3	13			0.2
245	1	24	0	Student	1.8	-1.4	2	9			1.8
246	1	31	0	employed	1.4	1	4	10			1.4
247	1	45	0	employed	1	-2.6	2	11			1
248	1	36	0	employed	1.4	-2	1	10			1.4
249	1	32	0	employed	-0.6	0	1	10			-0.6
250	1	22	0	Not employed	1.4	1.8	5	17			1.4
251	1	23	1	Student	2.4	-1.6	2	14			2.4
252	1	24	1	Not employed	1.2	0.2	3	20			1.2
253	1	27	1	employed	1.2	-0.2	4	11			1.2
254	1	21	0	employed	0.6	-0.4	3	19			0.6
255	1	35	0	employed	-1.6	-0.6	1	10			-1.6
256	1	34	0	employed	0.6	-3	3	9			0.6
257	1	45	1	employed	2	-2.8	1	9			2
258	1	39	0	employed	0	0.2	2	9			0
259	1	36	1	employed	1.8	-2.2	4	14			1.8
260	1	30	0	employed	2	1.6	1	12			2
261	1	23	0	Not employed	-0.8	0.4	4	17			-0.8
262	1	34	0	employed	1	0.4	2	14			1
263	2	21	1	Student	1.4	-1.6	2	24			1.4
264	2	27	0	Student	1.4	-0.8	4	36			1.4
265	2	31	0	Student	0.4	-1.6	2	13			0.4
266	2	41	1	employed	1.6	-2	2	20			1.6
267	2	30	0	employed	1.8	-0.8	2	16			1.8
268	2	36	0	employed	1	-0.8	3	18			1
269	2	30	0	employed	0.8	0.6	3	11			0.8
270	2	48	0	employed	-0.6	-3	1	17			-0.6
271	2	23	0	employed	0.8	0.8	5	27			0.8
272	2	38	0	employed	1	-2	2	13			1
273	2	22	0	Student	1.8	0.8	2	13			1.8
274	2	27	0	employed	1.8	-1.6	3	16			1.8
275	2	24	0	Student	-0.4	0.8	2	17			-0.4
276	2	25	0	Student	-0.4	0.2	3	31			-0.4
277	2	27	0	employed	-0.4	-0.2	3	21			-0.4
278	2	28	1	Student	0.8	2	3	31			0.8
279	2	32	1	employed	2.8	-1	4	26			2.8
280	2	32	1	employed	2.2	-2	1	23			2.2
281	2	34	0	Student	0.6	-0.4	3	23			0.6
282	2	27	0	employed	0.8	0.6	3	23			0.8
283	2	26	1	employed	-0.4	-0.8	3	14			-0.4
284	2	22	0	employed	1.2	-0.4	5	16			1.2
285	2	26	1	Student	-0.4	0.6	3	24			-0.4
286	2	21	0	Student	-1.8	1.6	1	18			-1.4
287	2	25	0	employed	1.2	-0.4	3	25			1.2
288	2	33	1	employed	0	-2.4	1	11			0
289	2	21	0	Student	1.6	2.8	5	18			1.6
290	2	46	0	employed	0	-0.8	2	16			0
291	2	21	0	Student	1.2	0.8	5	17			1.2
292	2	34	0	employed	0.4	0.6	5	20			0.4
293	2	24	1	Not employed	1.4	-2.2	2	10			1.4
294	2	25	0	employed	1.4	-0.6	2	19			1.4
295	2	31	0	employed	0.2	-1	3	27			0.2
296	2	38	0	employed	0	-0.6	2	11			0
297	2	36	1	Not employed	-1	-1.4	1	29			-1
298	2	38	1	employed	-0.6	1.4	4	32			-0.6
299	2	26	0	employed	1	-1.8	1	18			1
300	2	25	0	Student	2.4	0.8	2	24			2.4
301	2	31	1	Not employed	1	-1.4	1	17			1
302	2	31	0	employed	1.2	0.4	2	26			1.2
303	2	32	0	Not employed	2.2	2.2	1	15			2.2
304	2	28	1	Student	1.4	-0.4	3	19			1.4
305	2	23	0	employed	0.8	-1.2	1	18			0.8
306	2	29	1	employed	0.4	-0.4	3	14			0.4
307	2	50	0	employed	0.2	-1.2	1	20			0.2
308	2	23	1	Student	0.8	0.8	3	20			0.8
309	2	29	0	employed	2.4	-2.6	1	13			2.4
310	2	38	1	employed	1.4	2.2	4	24			1.4
311	2	29	1	Not employed	1	-0.8	2	25			1
312	2	23	0	employed	0.2	0	2	18			0.2
313	2	59	1	Not employed	-0.6	0	2	10			-0.6
314	2	22	1	Student	0.4	-1	2	24			0.4
315	2	23	1	Student	0	0	2	11			0
316	2	26	0	employed	1	-0.6	2	14			1
317	2	24	0	Student	2.6	2.6	5	19			2.6
318	2	26	0	employed	1.8	-0.4	2	17			1.8
319	2	30	0	employed	1.8	-1.2	5	29			1.8
320	2	28	0	employed	1.2	1.4	2	24			1.2
321	2	22	1	Student	1.2	-1.4	2	16			1.2
322	2	42	1	Not employed	0.4	0.8	3	28			0.4
323	2	19	1	Student	1.4	-2.2	1	14			1.4
324	2	29	0	employed	2.6	0.2	1	37			2.6
325	2	32	0	employed	0	0	1	17			0
326	2	21	1	employed	2	0.8	1	24			2
327	2	42	1	employed	1.8	0	4	38			1.8
328	2	31	0	employed	0.8	0.6	3	21			0.8
329	2	24	0	Student	-1.4	1.6	2	17			-1.4
330	2	31	0	employed	0.8	-1	2	17			0.8
331	2	40	0	employed	2.2	1.4	2	34			2.2
332	2	21	1	employed	2.6	0.2	5	28			2.6
333	2	47	0	employed	1.4	1.6	3	26			1.4
334	2	29	0	Student	1.8	-2.4	5	12			1.8
335	2	26	0	employed	1.6	0.8	2	24			1.6
336	2	40	0	employed	1.4	-0.6	2	17			1.4
337	2	23	1	Student	1.4	0.6	5	22			1.4
338	2	31	1	employed	0.8	0.6	3	28			0.8
339	2	22	1	employed	1.2	0.8	2	20			1.2
340	2	37	0	employed	-1.4	-1.8	1	12			-1.4
341	2	28	1	employed	2	-0.4	4	33			2
342	2	44	1	Student	1.6	-0.6	3	24			1.6
343	2	36	0	employed	0.4	-0.4	2	16			0.4
344	2	29	0	employed	-3	2	1	13			-1.4
345	2	28	0	employed	1.8	-1.4	1	23			1.8
346	2	22	1	employed	2.2	-1.6	5	35			2.2
347	2	31	0	Student	1	0.2	3	21			1
348	2	30	0	employed	0.8	-0.8	2	14			0.8
349	2	31	0	Student	-0.4	-0.2	2	16			-0.4
350	2	28	1	Student	-0.4	-0.8	2	24			-0.4
351	2	20	1	employed	2.4	2.2	5	29			2.4
352	2	27	1	employed	1.6	-2.8	1	9			1.6
353	2	24	0	Student	-0.6	-0.4	1	14			-0.6
354	2	27	1	employed	2.4	0.2	1	18			2.4
355	2	33	0	employed	1.6	-1.2	3	24			1.6
356	2	21	0	employed	1.6	-0.6	5	18			1.6
357	2	34	0	Student	0	0	1	16			0
358	2	32	0	employed	2.8	-2.8	1	12			2.8
359	2	31	1	Not employed	1.8	-1.2	1	16			1.8
360	2	34	0	Student	0.2	0.2	3	26			0.2
361	2	26	1	employed	0.4	0.2	2	22			0.4
362	2	25	1	Student	1.2	1.2	1	27			1.2
363	2	28	1	Student	1.2	2.8	1	12			1.2
364	2	21	0	employed	-1	-1.6	1	18			-1
365	2	24	0	Student	0.2	0	1	16			0.2
366	2	29	1	employed	0.6	-1.6	1	17			0.6
367	2	25	0	employed	0.8	0.6	2	16			0.8
368	2	24	0	employed	2	-0.2	1	19			2
369	2	29	0	employed	0	0.4	3	28			0
370	2	31	1	Not employed	0.8	0.8	1	21			0.8
371	2	35	1	Not employed	1.2	-0.6	1	25			1.2
372	2	27	0	employed	1.6	0.2	2	14			1.6
373	2	21	0	Student	-1.6	-0.2	1	15			-1.4
374	2	38	1	employed	0.4	0.2	2	21			0.4
375	2	25	1	employed	-0.4	1	2	25			-0.4
376	2	23	0	Student	1.2	-0.8	3	22			1.2
377	2	23	0	employed	-1.8	0.6	1	14			-1.4
378	2	24	0	Student	0.8	-1	1	24			0.8
379	2	28	0	employed	2.8	-0.2	1	12			2.8
380	2	22	0	Student	1.2	-0.2	1	21			1.2
381	2	32	1	employed	0.6	0.6	1	13			0.6
382	2	26	1	Student	2	-2.5	1	15			2
383	2	40	0	employed	1.8	-0.6	2	19			1.8
384	2	30	0	employed	0.4	-2.4	1	15			0.4
385	2	19	1	employed	0.6	0	1	26			0.6
386	2	25	0	Student	2	0.2	3	17			2
387	2	23	1	employed	1.4	1	3	28			1.4
388	2	44	0	employed	1.6	0.8	5	27			1.6
389	2	23	0	employed	1.8	-0.4	3	30			1.8
390	2	25	1	employed	1.2	-1.2	1	22			1.2
391	2	35	0	employed	0.4	1.2	3	26			0.4
392	2	32	0	employed	0.4	0	3	29			0.4
393	2	33	1	employed	0.8	-2.2	1	23			0.8
394	2	37	0	employed	1	-0.2	2	17			1
395	2	34	1	employed	0.8	-2.4	1	13			0.8
396	2	21	1	employed	0.8	-1	3	24			0.8
397	2	33	0	employed	0.6	-1.6	1	12			0.6
398	2	32	0	employed	0	-1	3	17			0
399	2	36	0	employed	0.6	1.8	5	31			0.6
400	2	31	1	Not employed	0.6	1.4	3	25			0.6
401	2	34	1	Not employed	1.8	2.2	3	27			1.8
402	2	42	1	employed	0.2	0.2	1	24			0.2
403	2	41	1	employed	2	-2.6	1	22			2
404	2	34	1	Not employed	1.4	-1	3	19			1.4
405	2	28	0	Not employed	1.4	-0.2	1	13			1.4
406	2	42	1	Not employed	1.2	-1.4	1	25			1.2
407	2	22	0	Student	0.6	-1.8	1	29			0.6
408	2	44	1	employed	2	0.6	5	23			2
409	2	35	1	employed	1.8	1.2	5	37			1.8
410	2	33	1	employed	-0.8	0	1	16			-0.8
411	2	34	0	employed	0.4	-0.2	3	19			0.4
412	2	39	0	employed	0.6	0.8	1	28			0.6
413	2	27	1	Not employed	1	0.6	1	16			1
414	2	32	0	employed	0.8	0	1	30			0.8
415	2	40	0	employed	1.4	-0.6	1	23			1.4
416	2	27	1	Not employed	1.6	-0.6	1	14			1.6
417	2	26	0	employed	1	0.4	2	29			1
418	2	36	0	employed	0.8	0.6	3	15			0.8
419	2	26	0	employed	0.8	1.4	5	34			0.8
420	2	32	0	employed	1.8	-1	2	16			1.8
421	2	46	0	employed	2.6	-0.8	1	11			2.6
422	2	43	0	employed	0.2	0	2	16			0.2
423	2	42	1	employed	1.6	-1.8	2	23			1.6
424	2	27	0	employed	2.4	-2.2	4	35			2.4
425	2	24	0	employed	1.8	0.4	5	24			1.8
426	2	32	1	employed	2	0.6	2	17			2
427	2	27	0	Student	-1	-0.4	2	9			-1
428	2	34	1	employed	0.6	0.4	2	23			0.6
429	2	30	0	employed	-0.6	0.2	1	21			-0.6
430	2	22	0	employed	0.2	-0.6	1	16			0.2
431	2	36	1	Not employed	2.6	2.8	1	20			2.6
432	2	28	0	employed	1.6	0.2	1	14			1.6
433	2	22	1	Student	0.4	1	1	15			0.4
434	2	49	1	employed	1.8	0	2	17			1.8
435	2	48	0	employed	-2.2	0.6	1	10			-1.4
436	2	38	0	employed	2	0.4	3	19			2
437	2	23	1	Student	1.2	0.8	3	29			1.2
438	2	38	1	Not employed	-0.2	-1.8	1	13			-0.2
439	2	46	0	employed	0.2	0	1	16			0.2
440	2	32	0	employed	1.2	-1	1	17			1.2
441	2	49	0	employed	0.6	-0.8	1	19			0.6
442	2	30	1	employed	1	0	1	22			1
443	2	36	1	employed	2.4	-2	1	15			2.4
444	2	52	0	employed	1	0.6	3	23			1
445	2	52	0	Not employed	0	1.8	2	27			0
446	2	38	0	employed	1.2	0.8	3	20			1.2
447	2	51	1	employed	0.6	-0.6	2	23			0.6
448	2	27	1	employed	1.2	-0.6	2	22			1.2
449	2	28	0	employed	2.2	1.6	2	28			2.2
450	2	34	0	employed	0.2	-1.4	3	15			0.2
451	2	41	0	employed	1.2	0.8	3	24			1.2
452	2	43	1	Student	0	0	3	23			0
453	2	22	1	Student	1.6	0.4	2	24			1.6
454	2	22	0	employed	1	0	2	35			1
455	2	18	0	Student	-0.6	0.2	2	24			-0.6
456	2	34	1	employed	2.2	0.8	2	23			2.2
457	2	26	1	employed	1.4	-1	3	18			1.4
458	2	41	0	employed	1.8	0.4	3	25			1.8
459	2	42	0	employed	0.6	0.4	3	23			0.6
460	2	35	0	employed	1	-0.8	1	22			1
461	2	32	1	employed	1.4	1.4	1	24			1.4
462	2	23	1	employed	1	-0.6	3	21			1
463	2	33	0	employed	0.2	0	1	18			0.2
464	2	22	0	employed	3	-1.6	5	35			3
465	2	29	0	employed	-0.8	-1	1	23			-0.8
466	2	47	0	employed	0.6	0.2	1	16			0.6
467	2	32	0	Student	1	-0.4	1	11			1
468	2	20	0	Student	0.4	-1.6	1	12			0.4
469	2	20	0	Student	1.6	0.4	3	21			1.6
470	2	49	1	employed	0.4	-2.4	2	12			0.4
471	2	41	0	employed	0.2	-1.2	1	16			0.2
472	2	38	0	employed	0.4	-0.4	5	24			0.4
473	2	30	1	employed	1	1.4	1	22			1
474	2	28	0	employed	0.8	-1	3	28			0.8
475	2	30	1	Not employed	1.6	-2.6	2	24			1.6
476	2	40	1	employed	0.6	0.6	2	26			0.6
477	2	25	0	employed	1.8	2.2	5	37			1.8
478	2	36	0	employed	1.4	0	1	15			1.4
479	2	19	1	Student	0.4	1	3	36			0.4
480	2	18	0	Student	1.6	1.6	1	32			1.6
481	2	20	0	Student	1.8	-2.6	3	24			1.8
482	2	21	0	employed	1.6	2.2	5	35			1.6
483	2	51	1	employed	1	-1.2	2	11			1
484	2	35	0	employed	2.4	-0.2	5	28			2.4
485	2	52	1	employed	-0.8	2	1	21			-0.8
486	2	35	1	employed	0.2	-0.6	5	38			0.2
487	2	28	1	employed	-0.2	0.6	2	25			-0.2
488	2	25	1	employed	2	-0.8	1	21			2
489	2	32	0	employed	-0.2	-0.8	1	13			-0.2
490	2	28	0	employed	1.4	1.4	3	28			1.4
491	2	50	0	employed	1.6	-1.8	2	21			1.6
492	2	43	0	employed	0.4	1	1	18			0.4
493	2	35	0	employed	1.2	-0.6	1	10			1.2
494	2	41	0	employed	1.4	0.6	3	30			1.4
495	2	21	0	Student	-0.2	0.6	1	22			-0.2
496	2	31	0	employed	2	-1	3	34			2
497	2	35	1	employed	1.6	0.2	1	22			1.6
498	2	35	0	employed	1.8	-2.4	5	19			1.8
499	2	21	0	Student	1	0.2	1	25			1
500	2	33	0	employed	-1	-1.8	1	23			-1
501	2	22	1	Not employed	0.4	-0.6	1	18			0.4
502	2	35	0	employed	0.8	1.2	3	25			0.8
503	2	45	1	employed	1.2	-0.6	1	19			1.2
504	2	22	0	Student	1.2	0.2	3	22			1.2
505	2	40	0	Not employed	0.2	-0.8	1	21			0.2
506	2	34	1	employed	1	-0.8	3	16			1
507	2	44	0	employed	0.8	0.4	3	21			0.8
508	2	23	1	Student	1.4	-0.6	2	28			1.4
509	2	33	0	employed	-0.4	-0.8	1	17			-0.4
510	2	28	1	Not employed	2	0.4	3	23			2
511	2	22	0	employed	0.8	-1.2	1	27			0.8
512	2	42	1	employed	0.4	-0.2	3	19			0.4
513	2	21	0	Student	1.8	1	4	26			1.8

## Sheet: Data_Dictionary
Variable	Questions	Response options
Culture		1= European, 2= Arab
Gender	What is your gender	Male, Female, Prefer not to answer		0 = Male, 1 = Female
Age	What is your age	List of options start from 18
Employment	Whats your profession?	Employed, Not employed, Student
NFA_AP	Affect approach score for the respective 5 items were assessed using the 10-item Need for Affect Questionnaire–Short Form (NAQ–S), (Appel et al., 2012)
NFA_AV	Affect avoidance score for the respective 5 items were assessed using the 10-item Need for Affect Questionnaire–Short Form (NAQ–S), (Appel et al., 2012)
FoMO	Do you experience FoMO (the fear of missing out)? FoMO refers to the fear of not being able to know what is happening online and participate in it.	1 = Not at all true of me, 2 = Slightly true of me, 3 = Moderately true of me, 4 = Very true of me, 5 = Extremely true of me
SMD_Score	The total score of the Social Media Disorder scale, which encompasses nine items (Van Den Eijnden et al., 2016)
NFA_AP_outliers replaced	Affect approach score with outliers replaced
